# Supplementary material
Source: ML conference proceedings conference paper supplement (https://openreview.net/forum?id=iCprPzyrRp)
Supplement: supplementary_material [file Main and appendix.pdf › Main and appendix.pdf]

# FROM CHEAP GEOMETRY TO EXPENSIVE PHYSICS: ELEVATING NEURAL OPERATORS VIA LATENT SHAPE PRETRAINING

**Anonymous authors**

Paper under double-blind review

## ABSTRACT

Industrial design evaluation often relies on high-fidelity simulations of governing partial differential equations (PDEs). While accurate, these simulations are computationally expensive, making dense exploration of design spaces impractical. Operator learning has emerged as a promising approach to accelerate PDE solution prediction; however, its effectiveness is often limited by the scarcity of labeled physics-based data. At the same time, large numbers of geometry-only candidate designs are readily available but remain largely untapped. We propose a two-stage framework to better exploit this abundant, physics-agnostic resource and improve supervised operator learning under limited labeled data. In Stage 1, we pretrain an autoencoder on a geometry reconstruction task to learn an expressive latent representation without PDE labels. In Stage 2, the neural operator is trained in a standard supervised manner to predict PDE solutions, using the pretrained latent embeddings as inputs instead of raw point clouds. Transformer-based architectures are adopted for both the autoencoder and the neural operator to handle point cloud data and integrate both stages seamlessly. Across four PDE datasets and three state-of-the-art transformer-based neural operators, our approach consistently improves prediction accuracy compared to models trained directly on raw point cloud inputs. These results demonstrate that representations from physics-agnostic pretraining provide a powerful foundation for data-efficient operator learning.

## 1 INTRODUCTION

Partial differential equations (PDEs) are fundamental descriptors for various physical and engineering systems (Guenther & Lee, 1996). Traditionally, PDEs are solved numerically by various discretization methods such as finite element, finite difference, finite volume, etc. (Reddy, 1993; Perrone & Kao, 1975) which offer high accuracy at huge computation cost (Greenspan, 1955). This costly simulation process can be significantly accelerated by training surrogate neural operators to learn mappings from input functions to PDE solutions. As the pioneer neural operator work, DeepONet adopted MLP structures and established theoretical foundations for operator learning (Lu et al., 2021). Kernel-based operators (Li et al., 2020a;b) are then proposed to better handle resolution invariance. Recent studies focus on transformer-based neural operators (Cao, 2021; Hao et al., 2023; Wu et al., 2024) to handle complex irregular geometry inputs and further improve computation efficiency.

Despite architectural progress, the accuracy of neural operators still depends heavily on labeled PDE solutions produced by expensive simulations. To mitigate data scarcity, several works adopt masked reconstruction pretraining on neural operator inputs (Chen et al., 2024; Rahman et al., 2024). This is motivated by the widely adopted pretraining techniques in computer vision and natural language processing (He et al., 2022; Devlin et al., 2019), but is only applicable to problems with [fixed topologies](#). Deng et al. (2024) couples neural operators with a ULIP-2 pretrained Point-BERT, which assumes surface point cloud inputs. Cheng et al. (2024) proposes to predict deviation from a reference solution, requiring grid topology correspondence across data samples. These methods are effective within their constraints, but their applicability to general PDE problems with versatile input formats remains limited.

054 A complementary direction explores supervised pretraining on large scale PDE solutions with related  
 055 underlying physics. Serrano et al. (2024) trains a latent space via physical field reconstruction and  
 056 perform latent rollouts to stabilize dynamics. Hao et al. (2024) and McCabe et al. (2024) train  
 057 foundation spatiotemporal neural operator on large scale datasets covering different variants of  
 058 computation fluid dynamic (CFD) PDEs, showing enhanced accuracy when finetuned on small fluid  
 059 datasets. In industrial practice, however, PDE solution labels are scarce and assembling large physics  
 060 datasets is rarely feasible. By contrast, geometry only data (mesh without solver labels) are plentiful  
 061 yet underused. This physics-agnostic resource offers an untapped path to improve operator learning  
 062 under label scarcity.

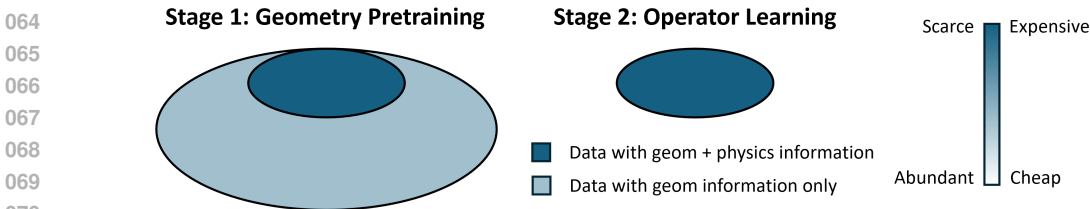

074 Figure 1: Illustration of the proposed two-stage training framework. Stage 1 leverages the abundant  
 075 geometry data for pretraining. Stage 2 learns PDE solutions on the scarce physics data.

076 To exploit the abundant geometry information while respecting the limited PDE solution labels, we  
 077 propose the replace the standard end-to-end supervised recipe with a two-stage training pipeline  
 078 as shown in Fig. 1. Stage 1 pretrains a point cloud variational autoencoder (VAE) to extract latent  
 079 geometry representation using a large point cloud/mesh dataset. A physics-agnostic proxy task  
 080 is introduced as the reconstruction objective for VAE training. In stage 2, neural operators are  
 081 trained to predict PDE solutions from the stage 1 latents rather than raw point clouds. As stage 1 is  
 082 exposed to far more geometries than labeled PDE solutions, the pretrained encoder can regularize  
 083 and compensate for point cloud inputs (which are downsampled realizations of geometries), yielding  
 084 more informative representations and improving data efficiency on scarce PDE datasets. The main  
 085 contribution of our framework are summarized as follows:

- 086 • We propose a novel two-stage training framework for operator learning tasks. Stage 1  
 087 performs pretraining on unlabeled point clouds via a proxy task to learn latent geometry  
 088 representation. Stage 2 trains neural operators to predict PDE solutions from these latents.  
 089 This training scheme allows full exploitation of geometry-only data without PDE labels.
- 090 • We introduce occupancy reconstruction as the objective of stage 1 pretraining, allowing  
 091 physics-agnostic self-supervised representation learning on irregular geometries realized  
 092 as point clouds. The selection of proxy task is flexible, which can be swapped for signed  
 093 distance fields, shortest vector fields, and other choices.
- 094 • We examine the two-stage training framework across four PDE problems and three  
 095 transformer-based neural operators. Experiments show consistent performance gain when  
 096 compared with direct single stage supervised training.

096 **2 PRELIMINARIES**

097 In this section, we define the problem and data settings. Then we briefly summarize related works on  
 098 operator learning and pretraining.

099 **2.1 PROBLEM SETUP**

100 We consider PDE problems defined in the domain  $\Omega \subset \mathbb{R}^d$  to be approximated with a learned operator  
 101  $\mathcal{F} : A \rightarrow U$  where  $A$  represents the input function space and  $U$  represents the solution function space  
 102 of the physics over  $\Omega$ . In general scenarios,  $A$  may consist of various types of information such as  
 103 object geometries (material distribution), boundary conditions, source functions, etc. For simplicity,  
 104 the input function space is assumed to contain only object geometry information, and the solution  
 105 function is assumed to be scalar valued in this work. A realization of the geometry information  
 106

$a_k \in A$  is represented as a point cloud (nodes of a mesh)  $a_k = \{x_k^i\}_{i=1}^N = \mathbf{X}_k \in \mathbb{R}^{N \times d}$  with  $N$  points in domain  $\Omega$ . And the physics solution function  $u_k \in U$  is realized as  $\{(y_k^i, u_k^i)\}_{i=1}^{N'}$  with  $u_k^i = u_k(y_k^i)$ , where  $\{y_k^i \in \Omega\}_{i=1}^{N'}$  is a set of query points.

In this work, we consider two qualitatively different portions  $D$  and  $D'$  from each dataset:

$$D = \{(a_k, u_k)\}_{k=1}^{|D|}, \quad D' = \{(a_j)\}_{j=1}^{|D'|}, \quad |D'| \gg |D| \quad (1)$$

Here,  $D$  is the physics portion with ground truth fields produced by a numerical solver, while  $D'$  is the geometry-only portion that is abundant. This is highly related to many industrial scenarios where geometry designs are easy to generate, but physical field labels are limited. Motivated by such scenarios, we aim to leverage  $D'$  to improve prediction accuracy on  $D$ , thereby alleviating the persistent data-scarcity bottleneck in operator learning.

## 2.2 RELATED WORK

**Neural Operators.** Operator learning aims to establish a mapping from input functions to solution functions. DeepONet established theoretical foundations for operator learning (Lu et al., 2021), followed by two important milestones: Graph Neural Operator (GNO) (Li et al., 2020b) and Fourier Neural Operator (FNO) (Li et al., 2020a). A set of follow-up works further extended GNO and FNO to irregular geometries (Li et al., 2023b;a) and improved computation efficiency (Guibas et al., 2021; Tran et al., 2021). [Another line of work adapts the PointNet architecture to operator learning tasks \(Kashefi et al., 2021; He et al., 2024\), building on its original use for point cloud classification and segmentation \(Qi et al., 2017\).](#) With the rise of attention mechanism, architectural design shifted toward transformers (Cao, 2021; Li et al., 2022), where spatial locations and field values are tokenized as query, key, and value sequences. General Neural Operator Transformer (GNOT) Hao et al. (2023) introduced heterogeneous cross-attention to handle versatile input functions and gating mechanism to adjust network focus. Universal Physics Transformers (UPT) Alkin et al. (2024) adopts an encoder-decoder architecture to roll out physics evolution in the latent space, which an end-to-end training process. Transolver Wu et al. (2024) proposed the usage of physics attention to efficiently pathify point based input tokens into learnable slices, which are projected back to query coordinates at the output layer. Latent Neural Operator (LNO) Wang & Wang (2024) proposed the invertible physics-cross-attention to efficiently perform compute attention on latent tokens. Overall, transformer-based neural operators have achieved state of the art in accuracy, offer greater input flexibility, and exhibit strong parallelization potential.

**Operator Pretraining.** Self-supervised pretraining on large dataset has proved effective in natural language processing tasks Devlin et al. (2019); Raffel et al. (2020), computer vision tasks He et al. (2022); Dosovitskiy et al. (2020), and some scientific tasks Zhou et al. (2023); Nguyen et al. (2023). Following a similar practice, Chen et al. (2024) and Rahman et al. (2024) pretrains neural operators by masking and reconstructing data inputs on fixed grid structures. 3D-GeoCA (Deng et al., 2024) attempts to directly guide neural operators via Point-BERT pretrained on ULIP-2 (Xue et al., 2024) for processing surface grids. These works demonstrate the potential of unsupervised pretraining in operator learning, but requires specific input formats. AROMA (Serrano et al., 2024) proposes to pretrain a latent space via physics reconstruction to stabilize long horizon rollouts for dynamic problems. MPP (McCabe et al., 2024) and DPOT (Hao et al., 2024) demonstrate effectiveness of autoregressive pretraining on spatiotemporal fields across datasets that share similar underlying fluid dynamics. However, these studies focus primarily on squeezing more values from PDE solutions while leaving geometry data untapped. This highlights a key gap: developing physics-agnostic pretraining strategies for neural operators on general irregular geometries.

## 3 METHODS

We propose to split the entire training process into two stages as seen in Fig. 2. Stage 1 performs pretraining on physics-agnostic  $(a, o)$  data pairs from  $D \cup D'$  to learn a better representation from input point clouds  $a$ , where  $o \in O$  represents a proxy task  $\mathcal{G} : A \rightarrow O$  that can be obtained from  $a$  at negligible computation cost. The two datasets are therefore augmented to  $D = \{(a, o, u)\}^{|D|}$  and  $D' = \{(a, o)\}^{|D'|}$ . Stage 2 leverages the representation from stage 1 and follows common neural operator training practice on  $D$  to predict  $u$  from  $a$ .

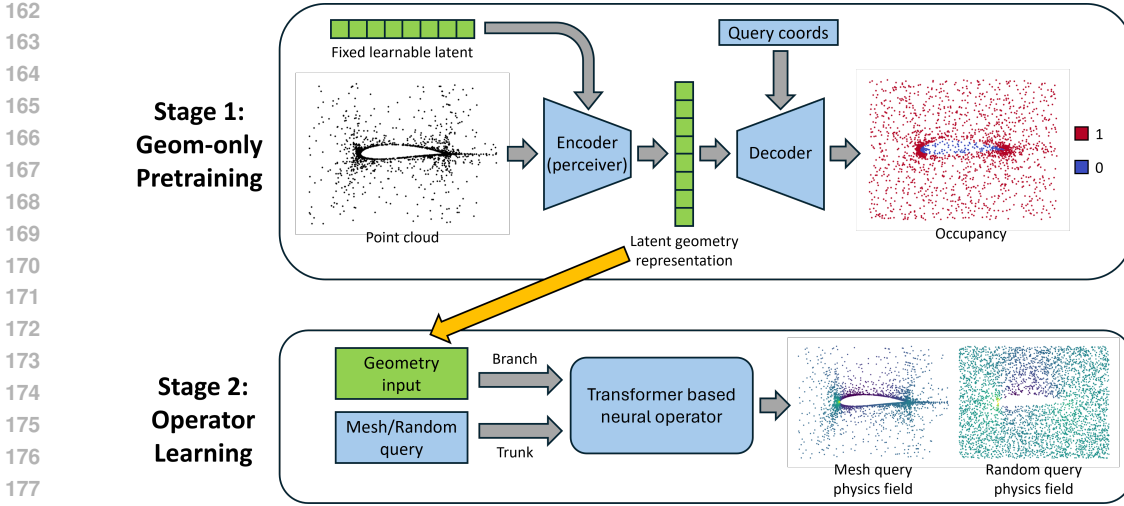

Figure 2: An illustration of our two-stage training framework. In stage 1, an encoder is pretrained on rich geometry data using a physics-agnostic proxy task, for which we choose occupancy field. The encoded latent representation is then integrated to transformer-based neural operators for stage 2 training on scarce PDE solution labels. The performance is tested on two query sampling strategies: mesh-based query, and uniform random queries.

### 3.1 PHYSICS-AGNOSTIC GEOMETRY PRETRAINING VIA OCCUPANCY PREDICTION

To obtain a meaningful representation from stage 1 pretraining, a proper proxy task should possess the following three features: **(1) Computation efficiency.** It should be broadly applicable and computable directly from the mesh/point cloud input  $a$  at low computation cost. **(2) Consistency with operator learning.** It should stay under the umbrella of operator learning tasks to bridge naturally towards physical field prediction. **(3) Sampling invariance.** It should treat different point cloud realizations of the same underlying geometry equivalently as discussed in Appendix B. Ideally, stage 1 pretraining would encode regions of high expected physical significance to better inform the operator training in stage 2. However, in a fully general setting without explicit physics supervision, it is difficult to design an inductive bias that consistently improves performance across all problems. Taking all these factors into consideration, we pick occupancy field (Mescheder et al., 2019)  $o \in O$  as the proxy task for the main experiments, which is realized (similar to  $u$ ) by its values on a set of query points  $\{(z_k^i, o_k^i)\}_{i=1}^{N''}$  with  $o_k^i = o_k(z_k^i) \in \{0, 1\}$ , where  $o(z) = 1$  indicates that  $z$  is inside an object and  $o(z) = 0$  vice versa. Note that our framework can be easily extended to other proxy tasks. In section 4.4 we also explore signed distance fields (SDF) and shortest vectors (SV) (Jessica et al., 2023) as alternative proxy tasks, while reserving occupancy fields for the main experiments.

To extract geometry representation from the occupancy proxy task, we follow the practice in Zhang et al. (2023) to train a point cloud variational autoencoder (VAE) in stage 1 as shown in Fig. 2. The encoder  $\mathcal{E}$  adopts a perceiver architecture for aggregating the point cloud information into a fixed length vector, which is then projected into a probabilistic latent space via  $MLP_\mu : \mathbb{R}^C \rightarrow \mathbb{R}^{C_0}$  and  $MLP_\sigma : \mathbb{R}^C \rightarrow \mathbb{R}^{C_0}$ :

$$\begin{aligned} m^k &= \text{CrossAttn}(\mathbf{L}, \text{PosEmb}(a_k = \mathbf{X}_k)) \\ (h_\mu)_k^i &= MLP_\mu(m_i^k)_{i \in [1, 2, \dots, M]} \\ (h_\sigma)_k^i &= MLP_\sigma(m_i^k)_{i \in [1, 2, \dots, M]} \end{aligned} \quad (2)$$

where  $\mathbf{X} \in \mathbb{R}^{N \times d}$  is the  $d$  dimensional point cloud of  $N$  points,  $\text{PosEmb} : \mathbb{R}^d \rightarrow \mathbb{R}^C$  is a positional embedding neural network,  $\mathbf{L} \in \mathbb{R}^{M \times C}$  is a set of learnable tokens with fixed number  $M$ . The latent representation  $z \in \mathbb{R}^{M \times C_0}$  is then sampled as:

$$h_k^i = (h_\mu)_k^i + (h_\sigma)_k^i \cdot \epsilon \quad (3)$$

where  $\epsilon \sim \mathcal{N}(0, 1)$ . The decoder then predicts the occupancy value of a set of query points to reconstruct the geometry  $o_k(z_i) = \mathcal{D}(h_k)(z_i)$ , so that the latent representation resides in function

space (Appendix B). The training objective for the point cloud VAE takes the following form:

$$\min_{\phi, \eta} \frac{1}{|D \cup D'|} \sum_{k=1}^{|D \cup D'|} (\mathbb{E}_{z \sim p} \text{BCE}(\tilde{D}_\eta(\tilde{\mathcal{E}}_\phi(a_k))(z), o_k(z)) + \lambda \cdot \text{KL}(\mathcal{N}(h_\mu, h_\sigma) \parallel \mathcal{N}(0, 1))) \quad (4)$$

where  $\text{BCE}(\cdot, \cdot)$  stands for the binary cross entropy loss, and  $\lambda$  is the KL weight. The sampling strategy  $z \sim p$  for occupancy field consists of two parts: a uniform distribution over the computation domain  $\mathcal{U}(\Omega)$ , and perturbed point cloud  $z^i = x^i + \varepsilon^i$  where  $\varepsilon \sim \mathcal{N}(0, \zeta I)$  with  $\zeta$  being a small positive scalar. Physics datasets are oftentimes sparse as they are computationally expensive to collect. However, the geometry dataset can be dense ( $|D'| \gg |D|$ ) as the computation cost for generating new geometries is negligible.

### 3.2 STAGE 2 OPERATOR LEARNING

Instead of directly taking  $a$  as inputs, neural operators  $\mathcal{F}$  take advantage of the geometry representation learned from stage 1 pretraining (Fig. 2) in the form of  $\tilde{\mathcal{F}}_\theta(\tilde{\mathcal{E}}_\phi(a_k)) = u_k$ , where  $\theta$  is a set of trainable parameters. Notice that the latent tokens produced by the pretrained encoder  $\tilde{\mathcal{E}}_\phi$  can be smoothly integrated to transformer based neural operators discussed in section 2.2. The training goal is to minimize the relative L2 error where  $\hat{u}_k$  denotes the normalized ground truth physical field.

$$\min_{\theta} \frac{1}{|D|} \sum_{k=1}^{|D|} \frac{\sqrt{\sum_{i=1}^{N'} (\tilde{\mathcal{F}}_\theta^i(\tilde{\mathcal{E}}_\phi(a_k)) - \hat{u}_k^i)^2}}{\sqrt{\sum_{i=1}^{N'} (\hat{u}_k^i)^2}} \quad (5)$$

In stage 2 training, we only update parameters  $\theta$  while keeping the encoder  $\tilde{\mathcal{E}}_\phi$  frozen. In this work, we consider two types of different query strategies for  $u$  that are widely used in various operator learning studies: directly querying the physical field on the point cloud (mesh)  $\{y_k^i\} = \{x_k^i\}_{i=1}^N$ , and querying the physical field according to a set of uniformly sampled random points  $\{y_k^i \sim \mathcal{U}(\Omega)\}_{i=1}^{N'}$ .

## 4 EXPERIMENTS

We evaluate the proposed two-stage training framework on four different datasets as described in section 4.1. The quantitative evaluation of our method is presented in sections 4.3 and 4.4, showing that a learned latent geometry representation from physics-agnostic pretraining can enhance neural operator’s understanding of physics fields.

### 4.1 DATASETS

To examine our method, we modified the Elasticity (Li et al., 2023a) and AirfRans (Bonnet et al., 2022) datasets and built two new datasets to generate occupancy fields for stage 1 physics-agnostic pretraining, and physical field for stage 2 operator learning. The geometries in  $D'$  are sampled from the same (or similar) distribution as the geometries in  $D$ . We list the general statistics (Table 1) and the generation process of the datasets as the following. More details on datasets can be found in Appendix C.

**Stress.** We mimick the practice of the Elasticity dataset (Li et al., 2023a) to generate occupancy fields for stage 1 pretraining, and Von Mises stress fields for stage 2 operator learning.

**AirfRans (near).** We directly adopt the pressure field data from AirfRans (Bonnet et al., 2022) and truncate the domain ( $[-0.6, 1.6] \times [-0.5, 0.5]$ ) to focus only on the near volume of the airfoils. We then follow the instruction in (Bonnet et al., 2022) to generate new geometries via OpenFOAM and compute occupancy fields without running the CFD simulations.

**Inductor (3D).** We solve the Maxwell’s equations using Comsol for a parameterized 3D iron core subject to the current excitation in a copper coil. The norm of the magnetic flux density

field is exported as the physics field to be predicted. Occupancy fields are also generated for the parameterized iron cores.

**Electrostatics.** We solve the electrostatics Poisson equation in a domain that contains two materials with distinct permeability values. The two material domains are separated by a curved interface generated from a third order spline interpolation of 10 random points. We then compute the occupancy fields for stage 1 pretraining, and electric potential fields for stage 2 operator learning.

Table 1: Statistics of the four datasets for the main experiments. The second row shows the size of physics data labeled with PDE solutions  $u$ , the third row shows the total data size including physics and geometry-only data, while the last two rows show the computation time for solving PDEs and mere mesh generation.

| Statistics                       | Stress   | AirfRans (near) | Inductor (3D) | Electrostatics |
|----------------------------------|----------|-----------------|---------------|----------------|
| Dimension                        | 2D       | 2D              | 3D            | 2D             |
| Size of $D$ (train+test)         | 1900+200 | 800+200         | 900+300       | 1800+200       |
| Size of $D \cup D'$ (train+test) | 7600+500 | 2400+600        | 3600+300      | 7600+400       |
| Cost for $D$ (CPU hour)          | 270      | 7680            | 1200          | 130            |
| Cost for $D'$ (CPU hour)         | <0.1     | 0.14            | <0.1          | <0.1           |

All four datasets follow the format of the sample data point visualized in Figure 3. Stage 1 pretraining is performed on a combination of the two occupancy field sampling strategy on  $D \cup D'$  as discussed in section 3.1. In stage 2, we perform operator learning on  $D$  and report the physics field prediction accuracy on random uniform queries and mesh-based queries separately. We also concatenate the occupancy value  $o_k^i$  to the query coordinates  $y_k^i$  for training neural operators, so that the solution function takes the form  $\{([y_k^i, o_k^i], u_k^i)\}_{i=1}^{N'}$ . Note that for mesh-based queries where  $\{y_k^i\} = \{x_k^i\}_{i=1}^N$ , occupancy value is always 1.

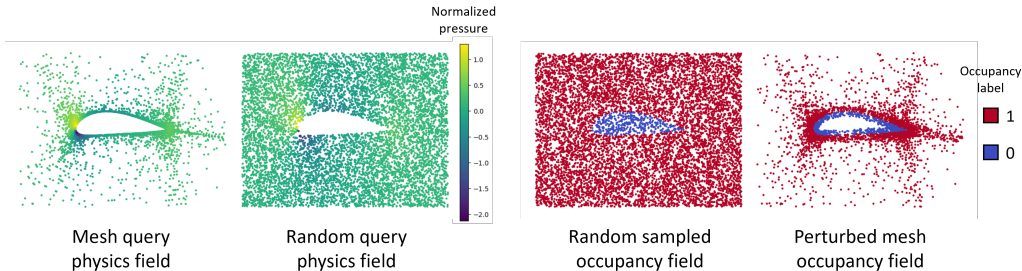

Figure 3: Visualization of a sample data point from the near volume AirfRans dataset. All of the datasets are preprocessed so that each data point consists of four types of information: physics field queried on the mesh point cloud, physics field queried on randomly sampled points, occupancy field queried on randomly sampled points, and occupancy field queried on the mesh point cloud perturbed by random displacements. **The geometry data  $D'$  are labeled only with occupancy fields.**

#### 4.2 MODELS AND TRAINING.

We benchmark three transformer-based neural operators GNOT (Hao et al., 2023), Transolver (Wu et al., 2024), LNO (Wang & Wang, 2024) by training each under the standard operator learning setting and under our proposed two-stage framework for performance comparison. The models are adjusted to have approximately the same number of learnable parameters. **Notice that we intentionally avoid exhaustive tuning of model or training hyperparameters, as our focus is on evaluating the effectiveness of the two-stage training strategy. Therefore, the reported performance should not be interpreted as a definitive comparison of model superiority.**

**Point cloud VAE.** We adopt the point cloud VAE architecture in Zhang et al. (2023) and train the model using Eq 4. We set the embedding dimension  $C$  to 256, latent dimension  $C_0$  to 32, learnable token number  $M$  to 256, and depth of self-attention layers on latent space to 6.

**GNOT.** We adopt the GNOT model proposed in (Hao et al., 2023), with a hidden size of 128, head number of 4, and layer number of 4 (each layer includes a linear self-attention and a linear cross-attention block). The gating strategy is excluded from the model to keep the comparison concise. The latent geometry representation can be fed directly into the GNOT branch net without modification.

**Transolver.** We adopt the Transolver model proposed in Wu et al. (2024), with a hidden size of 128, head number of 4, slice number of 32, and 9 layers of physics-attention. The “get grid” layer is excluded from the model to keep the comparison concise. As the vanilla Transolver model assumes coupled query positions and point cloud/function observation positions, we replace the first physics-attention layer of Transolver with a linear cross-attention layer from GNOT to allow for latent geometry representation inputs.

**LNO.** We adopt the LNO model proposed in (Wang & Wang, 2024), with a hidden size of 128, head number of 4, and 8 attention layers. The vanilla LNO assumes shared parameters for encoding position information of the trunk input and branch input. Instead, we use two distinct MLPs to allow for latent geometry representation inputs to the branch net.

**Training strategy.** In each VAE training iteration, 2048 points are sampled from the mesh to explicitly represent the geometry. 1024 points are sampled from the random occupancy field, and another 1024 points are sampled from the perturbed mesh occupancy field (illustrated in Figure 3) to estimate the geometry reconstruction error. We run 400 epochs using AdamW, with a half-cycle cosine scheduler of learning rate  $1 \times 10^{-3}$  and minimum learning rate  $1 \times 10^{-6}$ . All training processes of VAEs are completely agnostic of physics.

For all datasets, the first 100 physics data are used to normalize the physics field. We then compute relative L2 error (Eq 5) on the normalized physics field for training loss and evaluation metric. **Notice that the relative L2 error can appear much smaller on unnormalized datasets with large absolute values in the mean.** We run 200 epochs of training for experiments on neural operators, using the same optimizer and scheduler strategy as VAEs. In each operator training iteration, 2048 points are sampled from the mesh to explicitly represent the geometry, 4096 points are sampled from either the mesh query or random query physics field to estimate the operator prediction error. More details of GPU usage and compute resources are included in Appendix E.

### 4.3 MAIN RESULTS

We compare the performance of transformer-based neural operators between taking point clouds as inputs and taking pretrained latent representation from stage 1 as inputs. Table 2 shows the operator prediction error under mesh query and random query, with and without the encoder from stage 1 pretraining. The VAEs and neural operators in the main experiments are trained with datasets listed in Table 1, with a fixed KL weight of 0.001.

Across most settings, we observe clear performance improvement on physical field prediction after introducing the stage 1 geometry-only pretraining. The results are consistent across different datasets and neural operators, showing that the pretraining in stage 1 potentially constructs a stronger geometry representation than directly feeding raw point clouds. Note that point clouds are discretized approximations of real geometries, while the latent representation (residing in function space since it reconstructs the occupancy field) offers a more accurate approximation, especially after being enriched on diverse geometry data. We also observe larger improvements for randomly sampled query points than for mesh-based queries. One potential reason is that mesh-based sampling is denser than uniform sampling, particularly near geometry boundaries so that baseline models readily capture critical geometric details, leaving less headroom for pretraining. This phenomenon is most pronounced on the 3D Inductor dataset as uniform sampling in 3D space is especially inefficient.

### 4.4 ABLATION STUDY

**Number of geometry data.** As stage 1 physics-agnostic pretraining is decoupled from PDE solution labels, it is important study the impact of geometry data amount  $|D \cup D'|$  on operator performance. Experiments are conducted on the Stress dataset where we pretrain VAEs on geometries sampled

Table 2: Comparison of prediction errors on the four datasets. We report the mean error, with the standard deviation from three independent trials shown in parentheses. The two-stage training framework is tested on three transformer-based neural operators and compared with results from standard operator learning. We use bolded font to highlight the results when stage 1 pretraining enhances the performance of stage 2 operator learning.

| Dataset              | Query  | Relative L2 on normalized data ( $\times 10^{-2}$ ) |                  |           |                  |           |                  |
|----------------------|--------|-----------------------------------------------------|------------------|-----------|------------------|-----------|------------------|
|                      |        | GNOT                                                | G+VAE            | Trans     | T+VAE            | LNO       | L+VAE            |
| Number of parameters |        | 1.7-1.8 M                                           |                  | 1.7-1.8 M |                  | 1.8-1.9 M |                  |
| Stress               | Mesh   | 9.8(0.2)                                            | <b>9.0(0.1)</b>  | 11.5(0.2) | 11.2(0.2)        | 26.5(1.3) | <b>13.6(0.6)</b> |
|                      | Random | 10.3(0.2)                                           | <b>8.3(0.1)</b>  | 11.5(0.6) | <b>9.7(0.2)</b>  | 20.0(0.2) | <b>11.6(0.8)</b> |
| AirfR (near)         | Mesh   | 6.8(0.2)                                            | <b>5.6(0.1)</b>  | 13.4(0.3) | 12.7(0.3)        | 27.4(1.3) | 27.1(0.2)        |
|                      | Random | 7.8(0.2)                                            | <b>5.9(0.1)</b>  | 15.0(0.2) | <b>10.8(0.1)</b> | 25.3(1.8) | <b>10.0(0.2)</b> |
| Inductor (3D)        | Mesh   | 7.0(0.1)                                            | 7.1(0.1)         | 11.4(0.5) | <b>8.4(0.2)</b>  | 24.9(1.4) | <b>9.2(0.6)</b>  |
|                      | Random | 12.5(0.2)                                           | <b>11.8(0.2)</b> | 16.8(0.6) | <b>13.2(0.2)</b> | 20.3(1.0) | <b>13.0(0.2)</b> |
| Electrostatics       | Mesh   | 4.2(0.1)                                            | <b>3.3(0.1)</b>  | 5.0(0.1)  | <b>3.8(0.1)</b>  | 13.5(0.4) | <b>4.6(0.2)</b>  |
|                      | Random | 4.6(0.2)                                            | <b>3.4(0.0)</b>  | 5.6(0.1)  | <b>3.9(0.1)</b>  | 13.5(0.2) | <b>4.7(0.1)</b>  |

from four types of different void priors as shown in Table 3. We then compare the performance of GNOT and Transolver using the latent space from each VAE as shown in Table 4. VAE1 is exposed to the same data  $D$  as in stage 2, while VAE2 and VAE3 are trained on different settings of geometry data  $D'$ . It can be observed that the latent representation becomes stronger as more geometry data are added, even though some are sampled from different distributions. The improvement is less significant when the latent representation isn't augmented by extra geometry data (GNOT/Transolver+VAE1).

Table 3: Training metrics of stage 1 encoders using different number of geometry data on the stress dataset. Details of shape priors are discussed in Appendix C.

| Stress data                   | VAE1 | VAE2 | VAE3  |
|-------------------------------|------|------|-------|
| Ellipse $a = 0.3, b = 0.15$   | 1900 | 3800 | 1900  |
| Ellipse $a = 0.15, b = 0.3$   | 0    | 0    | 1900  |
| Rectangle $a = 0.3, b = 0.15$ | 0    | 0    | 1900  |
| Rectangle $a = 0.15, b = 0.3$ | 0    | 0    | 1900  |
| IOU(%)                        | 99.6 | 99.8 | 99.8  |
| KL loss                       | 0.70 | 0.69 | 0.955 |

Table 4: Performance of stage 2 PDE learning using encoders learned on different number of geometry data.

| Dataset                                       | Query  | Relative L2 on normalized data ( $\times 10^{-2}$ ) |        |        |             |
|-----------------------------------------------|--------|-----------------------------------------------------|--------|--------|-------------|
|                                               |        | GNOT                                                | G+VAE1 | G+VAE2 | G+VAE3      |
| Stress<br>Ellipse $a = 0.3, b = 0.15$<br>1900 | Mesh   | 9.8                                                 | 9.9    | 9.7    | <b>9.0</b>  |
|                                               | Random | 10.3                                                | 9.1    | 8.6    | <b>8.3</b>  |
|                                               | Mesh   | 11.5                                                | 12.0   | 11.4   | <b>11.2</b> |
|                                               | Random | 11.5                                                | 10.4   | 9.8    | <b>9.7</b>  |

**Effect of KL weight.** We investigate of effect of KL weight ( $\lambda$  in Eq 4). We train three VAEs and one deterministic autoencoder using all geometries in the Stress and the AirfRans datasets (Table 1) with the IOU and KL loss reported in Table 5. The prediction accuracy of GNOT and Transolver using the encoded latent space of the four autoencoders are listed in Table 6. In most scenarios, the performance of neural operators are improved with the latent representation provided by the stage 1 encoder. Although all of the four autoencoders achieve near 100% reconstruction IOU, training a probabilistic latent space in stage 1 with smaller regularization weight  $\lambda = 0.001$  or  $\lambda = 0.0001$  tend to provide more robust performance. That said, the optimal choice can depend on the specific neural operator architecture, as well as training hyperparameters, and the dataset being learned.



Table 5: Training metrics of point cloud autoencoder on the Stress and AirfRans (near) dataset at different KL weights.

|             | KL weight | 0.01 | 0.001 | 0.0001 | Deterministic |
|-------------|-----------|------|-------|--------|---------------|
| Stress      | IOU(%)    | 99.5 | 99.7  | 99.8   | 99.8          |
|             | KL loss   | 0.19 | 0.98  | 2.94   | N/A           |
| Airf (near) | IOU(%)    | 99.9 | 99.9  | 99.9   | 99.9          |
|             | KL loss   | 0.06 | 0.36  | 1.62   | N/A           |

Table 6: Prediction error of stage 2 neural operators using latent geometry representation from VAEs trained with different KL weights in stage 1. Here AE stands for deterministic autoencoder.

| Dataset     | Query  | Relative L2 on normalized data ( $\times 10^{-2}$ ) |            |             |              |             |
|-------------|--------|-----------------------------------------------------|------------|-------------|--------------|-------------|
|             |        | GNOT                                                | +VAE(0.01) | +VAE(0.001) | +VAE(0.0001) | +AE         |
| Stress      | Mesh   | 9.8                                                 | 9.9        | <b>9.0</b>  | 9.3          | 10.3        |
|             | Random | 10.3                                                | 9.7        | 8.3         | <b>8.0</b>   | 8.9         |
| Airf (near) | Mesh   | 6.8                                                 | 6.6        | 5.6         | <b>5.3</b>   | 5.9         |
|             | Random | 7.8                                                 | 6.2        | 5.9         | <b>5.2</b>   | 5.9         |
|             |        | Trans                                               | +VAE(0.01) | +VAE(0.001) | +VAE(0.0001) | +AE         |
| Stress      | Mesh   | 11.5                                                | 12.1       | <b>11.2</b> | 11.3         | 11.7        |
|             | Random | 11.5                                                | 11.4       | 9.7         | <b>9.4</b>   | 10.4        |
| Airf (near) | Mesh   | 13.4                                                | 13.2       | 12.7        | 12.3         | <b>11.3</b> |
|             | Random | 15.0                                                | 11.1       | 10.8        | 11.1         | <b>10.3</b> |

**Alternative proxy tasks.** While occupancy fields are selected as the default proxy task in the main experiments, our proposed framework is plug-and-play with alternative proxy task choices. In CFD problems such as AirfRans, SDF and SV are widely considered informative because they explicitly encode the relationship between arbitrary spatial locations and the nearest boundary, which is the dominant geometric factor in many CFD problems (Jessica et al., 2023). Therefore, we pretrain stage 1 with SDF or SV as the proxy task and evaluate stage 2 GNOT pressure prediction accuracy on AirfRans as shown in Table 7. When compared with direct supervised operator learning, the proposed two-stage approach remains effective in most scenarios, except for the SDF case on mesh-based physics field query where the pretraining stage offers no measurable gain. Notably, using SV as the proxy task yields the best physics field prediction accuracy. These results demonstrate both the effectiveness and breadth of our framework beyond occupancy fields. However, SDF or SV are not necessarily as informative for PDE problems beyond CFD, especially when volumetric properties from body mesh dominate over surface proximity. Therefore, we still believe that occupancy is a more general, intuitive, and task-agnostic proxy choice.

Table 7: GNOT performance on the AirfRans dataset: our two-stage framework with occupancy, SDF, and SV proxy tasks in pretraining vs. the standard operator learning results (also with SDF or SV included in inputs).

| Query             | Relative L2 on normalized data ( $\times 10^{-2}$ ) |       |      |           |           |            |
|-------------------|-----------------------------------------------------|-------|------|-----------|-----------|------------|
|                   | GNOT                                                | G+SDF | G+SV | G+OCC_VAE | G+SDF_VAE | G+SV_VAE   |
| AirfRans (Mesh)   | 6.8                                                 | 5.2   | 5.4  | 5.6       | 5.3       | <b>4.8</b> |
| AirfRans (Random) | 7.8                                                 | 6.5   | 5.1  | 5.9       | 5.4       | <b>4.9</b> |

## 5 CONCLUSION AND LIMITATION

The paper explores the feasibility of leveraging the abundant geometry data resource to augment the performance of neural operators on scarce physics labels. Specifically, we introduce a two-stage training work and propose to perform physics-agnostic pretraining on rich geometry data in stage 1 via an occupancy field reconstruction proxy task. The latent representation produced from the stage 1 encoder is then integrated to transformer-based neural operators for stage 2 physical field

486 prediction learning. Incorporation of stage 1 pretraining yields consistent accuracy gains across  
487 different datasets and neural operator backbones. The framework is also adaptable to different proxy  
488 tasks and operator architectures. The results highlight the importance of properly selecting and  
489 preprocessing the representation of geometry inputs to neural operators.

490 The proposed physics-agnostic pretraining also possesses a few limitations. First, the effectiveness of  
491 occupancy reconstruction with multiple interacting geometries remains unexplored. Such settings may  
492 require replacing the BCE objective with multi-class cross entropy loss. Second, the default choice  
493 of occupancy is intuitive, and a systematic study is needed to help select from various alternative  
494 proxies including occupancy fields, SDF, SV, Gaussian density fields, etc., based on the governing  
495 physics, input geometry format, and proxy task accessibility. Lastly, integration between stages could  
496 be deepened beyond simply feeding Stage 1 latents. Potential strategies include joint or sequential  
497 fine-tuning with adjusted learning rates, hybrid losses that couple reconstruction and PDE supervision,  
498 or adapter-based conditioning.

499  
500  
501  
502  
503  
504  
505  
506  
507  
508  
509  
510  
511  
512  
513  
514  
515  
516  
517  
518  
519  
520  
521  
522  
523  
524  
525  
526  
527  
528  
529  
530  
531  
532  
533  
534  
535  
536  
537  
538  
539

540 REPRODUCIBILITY STATEMENT  
541

542 Detailed descriptions of the experimental setup, task definitions, and evaluation metrics are provided  
543 in section 4 and Appendix C. Source code is attached in the submission.  
544

545 REFERENCES  
546

- 547 Benedikt Alkin, Andreas Fürst, Simon Schmid, Lukas Gruber, Markus Holzleitner, and Johannes  
548 Brandstetter. Universal physics transformers: A framework for efficiently scaling neural operators.  
549 *Advances in Neural Information Processing Systems*, 37:25152–25194, 2024.  
550
- 551 Florent Bonnet, Jocelyn Mazari, Paola Cinnella, and Patrick Gallinari. Airfrans: High fidelity com-  
552 putational fluid dynamics dataset for approximating reynolds-averaged Navier–Stokes solutions.  
553 *Advances in Neural Information Processing Systems*, 35:23463–23478, 2022.  
554
- 555 Shuhao Cao. Choose a transformer: Fourier or galerkin. *Advances in neural information processing*  
556 *systems*, 34:24924–24940, 2021.
- 557 Wuyang Chen, Jialin Song, Pu Ren, Shashank Subramanian, Dmitriy Morozov, and Michael W  
558 Mahoney. Data-efficient operator learning via unsupervised pretraining and in-context learning.  
559 *Advances in Neural Information Processing Systems*, 37:6213–6245, 2024.  
560
- 561 Ze Cheng, Zhongkai Hao, Xiaoqiang Wang, Jianing Huang, Youjia Wu, Xudan Liu, Yiru Zhao,  
562 Songming Liu, and Hang Su. Reference neural operators: Learning the smooth dependence of  
563 solutions of pdes on geometric deformations. *arXiv preprint arXiv:2405.17509*, 2024.
- 564 Jingyang Deng, Xingjian Li, Haoyi Xiong, Xiaoguang Hu, and Jinwen Ma. Geometry-guided  
565 conditional adaption for surrogate models of large-scale 3d PDEs on arbitrary geometries. 2024.  
566
- 567 Jacob Devlin, Ming-Wei Chang, Kenton Lee, and Kristina Toutanova. Bert: Pre-training of deep  
568 bidirectional transformers for language understanding. In *Proceedings of the 2019 conference of*  
569 *the North American chapter of the association for computational linguistics: human language*  
570 *technologies, volume 1 (long and short papers)*, pp. 4171–4186, 2019.
- 571 Alexey Dosovitskiy, Lucas Beyer, Alexander Kolesnikov, Dirk Weissenborn, Xiaohua Zhai, Thomas  
572 Unterthiner, Mostafa Dehghani, Matthias Minderer, Georg Heigold, Sylvain Gelly, et al. An  
573 image is worth 16x16 words: Transformers for image recognition at scale. *arXiv preprint*  
574 *arXiv:2010.11929*, 2020.  
575
- 576 Donald Greenspan. Methods of matrix inversion. *The American Mathematical Monthly*, 62(5):  
577 303–318, 1955.
- 578 Ronald B Guenther and John W Lee. *Partial differential equations of mathematical physics and*  
579 *integral equations*. Courier Corporation, 1996.  
580
- 581 John Guibas, Morteza Mardani, Zongyi Li, Andrew Tao, Anima Anandkumar, and Bryan Catan-  
582 zaro. Adaptive fourier neural operators: Efficient token mixers for transformers. *arXiv preprint*  
583 *arXiv:2111.13587*, 2021.  
584
- 585 Zhongkai Hao, Zhengyi Wang, Hang Su, Chengyang Ying, Yinpeng Dong, Songming Liu, Ze Cheng,  
586 Jian Song, and Jun Zhu. Gnot: A general neural operator transformer for operator learning. In  
587 *International Conference on Machine Learning*, pp. 12556–12569. PMLR, 2023.
- 588 Zhongkai Hao, Chang Su, Songming Liu, Julius Berner, Chengyang Ying, Hang Su, Anima Anandku-  
589 mar, Jian Song, and Jun Zhu. Dpot: Auto-regressive denoising operator transformer for large-scale  
590 pde pre-training. *arXiv preprint arXiv:2403.03542*, 2024.  
591
- 592 Junyan He, Seid Koric, Diab Abueidda, Ali Najafi, and Iwona Jasiuk. Geom-deeponet: A point-cloud-  
593 based deep operator network for field predictions on 3d parameterized geometries. *Computer*  
*Methods in Applied Mechanics and Engineering*, 429:117130, 2024.

- 594 Kaiming He, Xinlei Chen, Saining Xie, Yanghao Li, Piotr Dollár, and Ross Girshick. Masked  
595 autoencoders are scalable vision learners. In *Proceedings of the IEEE/CVF conference on computer  
596 vision and pattern recognition*, pp. 16000–16009, 2022.
- 597 Loh Sher En Jessica, Naheed Anjum Arafat, Wei Xian Lim, Wai Lee Chan, and Adams Wai Kin  
598 Kong. Finite volume features, global geometry representations, and residual training for deep  
599 learning-based CFD simulation. *arXiv preprint arXiv:2311.14464*, 2023.
- 600 Ali Kashefi, Davis Rempe, and Leonidas J Guibas. A point-cloud deep learning framework for  
601 prediction of fluid flow fields on irregular geometries. *Physics of Fluids*, 33(2), 2021.
- 602 Zijie Li, Kazem Meidani, and Amir Barati Farimani. Transformer for partial differential equations’  
603 operator learning. *arXiv preprint arXiv:2205.13671*, 2022.
- 604 Zongyi Li, Nikola Kovachki, Kamyar Azizzadenesheli, Burigede Liu, Kaushik Bhattacharya, Andrew  
605 Stuart, and Anima Anandkumar. Fourier neural operator for parametric partial differential equations.  
606 *arXiv preprint arXiv:2010.08895*, 2020a.
- 607 Zongyi Li, Nikola Kovachki, Kamyar Azizzadenesheli, Burigede Liu, Kaushik Bhattacharya, Andrew  
608 Stuart, and Anima Anandkumar. Neural operator: Graph kernel network for partial differential  
609 equations. *arXiv preprint arXiv:2003.03485*, 2020b.
- 610 Zongyi Li, Daniel Zhengyu Huang, Burigede Liu, and Anima Anandkumar. Fourier neural operator  
611 with learned deformations for pdes on general geometries. *Journal of Machine Learning Research*,  
612 24(388):1–26, 2023a.
- 613 Zongyi Li, Nikola Kovachki, Chris Choy, Boyi Li, Jean Kossaifi, Shourya Otta, Mohammad Amin  
614 Nabian, Maximilian Stadler, Christian Hundt, Kamyar Azizzadenesheli, et al. Geometry-informed  
615 neural operator for large-scale 3d pdes. *Advances in Neural Information Processing Systems*, 36:  
616 35836–35854, 2023b.
- 617 Lu Lu, Pengzhan Jin, Guofei Pang, Zhongqiang Zhang, and George Em Karniadakis. Learning  
618 nonlinear operators via DeeperNet based on the universal approximation theorem of operators.  
619 *Nature machine intelligence*, 3(3):218–229, 2021.
- 620 Michael McCabe, Bruno Régaldo-Saint Blancard, Liam Parker, Ruben Ohana, Miles Cranmer,  
621 Alberto Bietti, Michael Eickenberg, Siavash Golkar, Geraud Krawezik, Francois Lanusse, et al.  
622 Multiple physics pretraining for spatiotemporal surrogate models. *Advances in Neural Information  
623 Processing Systems*, 37:119301–119335, 2024.
- 624 Lars Mescheder, Michael Oechsle, Michael Niemeyer, Sebastian Nowozin, and Andreas Geiger.  
625 Occupancy networks: Learning 3d reconstruction in function space. In *Proceedings of the  
626 IEEE/CVF conference on computer vision and pattern recognition*, pp. 4460–4470, 2019.
- 627 Tung Nguyen, Johannes Brandstetter, Ashish Kapoor, Jayesh K Gupta, and Aditya Grover. Climax:  
628 A foundation model for weather and climate. *arXiv preprint arXiv:2301.10343*, 2023.
- 629 Nicholas Perrone and Robert Kao. A general finite difference method for arbitrary meshes. *Computers  
630 & Structures*, 5(1):45–57, 1975.
- 631 Charles Ruizhongtai Qi, Li Yi, Hao Su, and Leonidas J Guibas. Pointnet++: Deep hierarchical feature  
632 learning on point sets in a metric space. *Advances in neural information processing systems*, 30,  
633 2017.
- 634 Colin Raffel, Noam Shazeer, Adam Roberts, Katherine Lee, Sharan Narang, Michael Matena, Yanqi  
635 Zhou, Wei Li, and Peter J Liu. Exploring the limits of transfer learning with a unified text-to-text  
636 transformer. *Journal of machine learning research*, 21(140):1–67, 2020.
- 637 Md Ashiqur Rahman, Robert Joseph George, Mogab Elleithy, Daniel Leibovici, Zongyi Li, Boris  
638 Bonev, Colin White, Julius Berner, Raymond A Yeh, Jean Kossaifi, et al. Pretraining codomain at-  
639 tention neural operators for solving multiphysics pdes. *Advances in Neural Information Processing  
640 Systems*, 37:104035–104064, 2024.
- 641 Junuthula Narasimha Reddy. An introduction to the finite element method. *New York*, 27(14), 1993.

648 Louis Serrano, Thomas X Wang, Etienne Le Naour, Jean-Noël Vittaut, and Patrick Gallinari. Aroma:  
649 Preserving spatial structure for latent PDE modeling with local neural fields. *Advances in Neural*  
650 *Information Processing Systems*, 37:13489–13521, 2024.

651 Alasdair Tran, Alexander Mathews, Lexing Xie, and Cheng Soon Ong. Factorized fourier neural  
652 operators. *arXiv preprint arXiv:2111.13802*, 2021.

653 Tian Wang and Chuang Wang. Latent neural operator for solving forward and inverse pde problems.  
654 *arXiv preprint arXiv:2406.03923*, 2024.

655 Haixu Wu, Huakun Luo, Haowen Wang, Jianmin Wang, and Mingsheng Long. Transolver: A fast  
656 transformer solver for pdes on general geometries. *arXiv preprint arXiv:2402.02366*, 2024.

657 Le Xue, Ning Yu, Shu Zhang, Artemis Panagopoulou, Junnan Li, Roberto Martín-Martín, Jiajun  
658 Wu, Caiming Xiong, Ran Xu, Juan Carlos Niebles, et al. Ulip-2: Towards scalable multimodal  
659 pre-training for 3d understanding. In *Proceedings of the IEEE/CVF Conference on Computer*  
660 *Vision and Pattern Recognition*, pp. 27091–27101, 2024.

661 Biao Zhang, Jiapeng Tang, Matthias Niessner, and Peter Wonka. 3dshape2vecset: A 3d shape  
662 representation for neural fields and generative diffusion models. *ACM Transactions On Graphics*  
663 *(TOG)*, 42(4):1–16, 2023.

664 Gengmo Zhou, Zhifeng Gao, Qiankun Ding, Hang Zheng, Hongteng Xu, Zhewei Wei, Linfeng Zhang,  
665 and Guolin Ke. Uni-mol: A universal 3d molecular representation learning framework. 2023.

666  
667  
668  
669  
670  
671  
672  
673  
674  
675  
676  
677  
678  
679  
680  
681  
682  
683  
684  
685  
686  
687  
688  
689  
690  
691  
692  
693  
694  
695  
696  
697  
698  
699  
700  
701

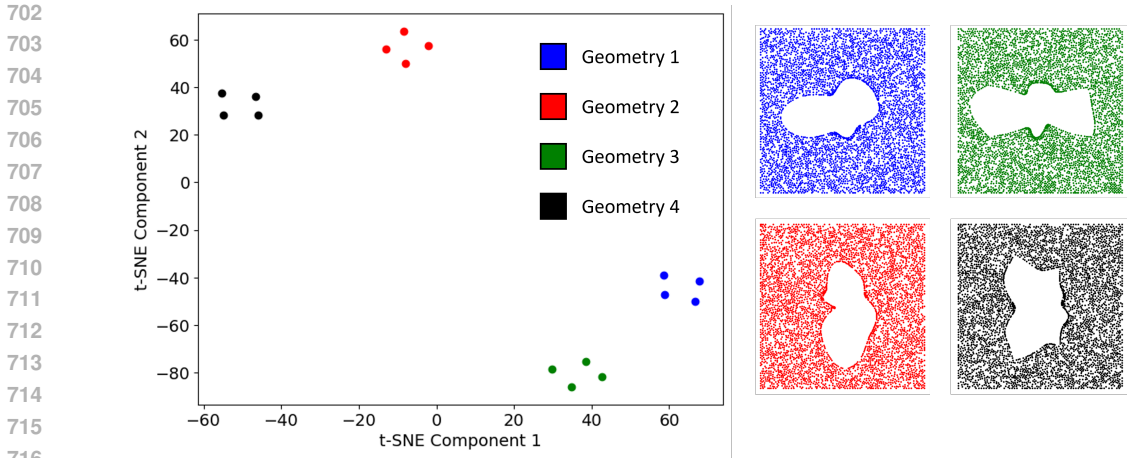

Figure 4: Visualization of stage 1 VAE latent space via t-SNE plot. The plot shows the latent representation of 4 different geometries. For each geometry, 4 different point clouds are sampled and encoded. Point clouds from the same geometry stay closer in the VAE latent space.

## A LLM USAGE

LLM is only used on grammar polishing for this paper.

## B AUTOENCODER LATENT SPACE AS A CHART ON THE MODULI SPACE OF GEOMETRIC STRUCTURES

**Designing Principles.** A central goal in shape analysis and geometry processing is to parametrize the space of geometric objects in a way that captures their essential structure while discarding irrelevant variations such as orientation, sampling density, or point ordering. This leads naturally to the idea of organizing geometric data—such as point clouds—into equivalence classes, where two point clouds are considered equivalent if they represent the same underlying shape up to transformations like rigid motion or reparameterization. The collection of these equivalence classes forms what is known in mathematics as a moduli space: a space whose points correspond to distinct geometric structures modulo some equivalence relation. In this framework, learning a meaningful representation of a point cloud becomes equivalent to coordinatizing the moduli space of shapes. An autoencoder offers a powerful data-driven approach to this problem: the encoder network acts as a learned coordinate chart, mapping each point cloud to a latent vector that serves as a representative for its equivalence class, while the decoder ensures that this latent code retains enough information to reconstruct the original geometry. Thus, the latent space can be interpreted as a learned, low-dimensional chart on the moduli space of point cloud geometries. This can be illustrated by the t-SNE plot in Figure 4. Point clouds corresponding to the same geometry form tight, well-separated clusters, indicating that the encoder learns a meaningful representation in which distances in latent space correlate with differences between underlying geometries.

**Formal Description.** Let  $\mathcal{X} \subset \mathbb{R}^{N \times d}$  denote the space of point clouds with  $N$  points in  $\mathbb{R}^d$ , and define an equivalence relation  $\sim$  such that  $P_1 \sim P_2$  if they represent the same underlying shape up to transformations from a group  $G$  such as permutation (automatically handled by transformer-based neural operators) and sampling/density variation (addressed in this work). Furthermore, rigid motion transformations can be easily incorporated into the proposed workflow with simple geometry data augmentation. The associated moduli space is the quotient space

$$\mathcal{M} = \mathcal{X} / \sim,$$

where each point  $[P] \in \mathcal{M}$  represents an equivalence class of point clouds corresponding to a single geometric structure.

An autoencoder consists of an encoder  $\mathcal{E} : \mathcal{X} \rightarrow \mathbb{R}^k$  and a decoder  $\mathcal{D} : \mathbb{R}^k \rightarrow \mathcal{X}$ , trained to minimize a reconstruction loss

$$\mathcal{L}(P) = \text{Dist}(P, \mathcal{D}(\mathcal{E}(P))),$$

where  $\text{Dist}$  is a distance metric invariant under the group  $G$ . Ideally, the encoder should be invariant under  $\sim$ , i.e.,  $P_1 \sim P_2 \Rightarrow \mathcal{E}(P_1) = \mathcal{E}(P_2)$ , implying that it factors through the projection  $\pi : \mathcal{X} \rightarrow \mathcal{M}$ . This gives the following commutative diagram:

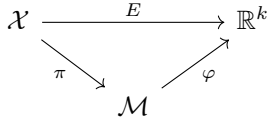

where  $\mathcal{E} = \varphi \circ \pi$ . While in practice  $\pi$  is not explicitly computed, and the encoder  $\mathcal{E}$  is trained end-to-end, this decomposition highlights the theoretical role of  $\mathcal{E}$ : it should act as both a projection onto an equivalence class and a parametrization of that class. Therefore, the learned latent space  $\mathbb{R}^k$  can be interpreted as a local coordinate system on the moduli space  $\mathcal{M}$ , and the encoder as a data-driven chart approximating this structure.

## C DATASETS

In this section, we explain the details of the datasets including the governing equations, boundary conditions, material property, and geometry configurations. The original AirfRans dataset (Bonnet et al., 2022) includes detailed airfoil boundary shape information for computing occupancy fields and generating new geometries. However, we choose to reproduce the Elasticity dataset (Li et al., 2023a) as the detailed void geometry information is missing.

**Stress.** We mimic the Elasticity dataset in (Li et al., 2023a) and regenerate the geometries and stress fields in Fenics. We find the distribution of von Mises stress  $\sigma_{vm}$  in a domain with an irregular void inside with a constant displacement vector at the top. We solve the following PDE:

$$\nabla \cdot \boldsymbol{\sigma}(u) = 0 \tag{6}$$

where  $u(x)$  is the displacement vector field,  $\boldsymbol{\epsilon} = \frac{\partial u}{\partial x}$  is the strain tensor, and  $\boldsymbol{\sigma} = \frac{\partial w(\boldsymbol{\epsilon})}{\partial \boldsymbol{\epsilon}}$  is the stress tensor. To obtain the energy  $w(\boldsymbol{\epsilon})$  we need to start with Cauchy Green stretch tensor  $\mathbf{C} = 2\boldsymbol{\epsilon} + \mathbb{I}$ , and then get  $w(\boldsymbol{\epsilon}) = C_1(\text{tr}(\mathbf{C}) - 3) + C_2(\frac{1}{2}(\text{tr}(\mathbf{C})^2 - \text{tr}(\mathbf{C})))$ . Two energy density parameters are:  $C_1 = 1.863 \times 10^5$  and  $C_2 = 9.79 \times 10^3$ . One can then plug this result back into Equation 6 to get an equation in terms of  $u(x)$ . Note that although Equation 6 is linear in terms of  $\boldsymbol{\sigma}$ , it is highly non-linear in terms of actual underlying field variable  $u(x)$ . After obtaining the displacement vector field, one can calculate stress tensor  $\boldsymbol{\sigma}$ , and then get von Mises stress field  $\sigma_{vm}$  from components of  $\boldsymbol{\sigma}$ :

$$\sigma_{vm} = \sqrt{\sigma_{xx}^2 - \sigma_{xx}\sigma_{yy} + \sigma_{yy}^2 + 3\sigma_{xy}^2} \tag{7}$$

For the solution domain, we have a square domain of  $[0, 1] \times [0, 1]$  with an irregular hole at the center. This hole is described by an expression in polar coordinates:  $r = r(\theta)$ . In our setup,  $r(\theta) = f(a, b, \theta) + \text{GRF}(A, l, \theta)$ . The first  $f$  term represents the prior void shape. The second term represents a Gaussian random field with an amplitude of  $A = 0.05$  and correlation length of  $l = 0.6$ . We generate geometries using 4 types of different void priors as listed in Table 3, where  $a$  represents the horizontal axis/edge of ellipse/rectangle and  $b$  represents the vertical axis/edge of ellipse/rectangle. Example of the solution  $\sigma_{vm}$  and geometries from different void priors are shown in Figure 5. We generate 1900 training data and 100 testing data (occupancy fields) for each type of void for geometry representation learning. Neural operators are trained with 1900 data and tested with 200 data (von Mises stress fields) from type 1 void only.

**AirfRans (near).** We directly adopt the simulation data in AirfRans Bonnet et al. (2022) which solves the Reynolds-Averaged Navier-Stokes Equations for airfoils. Unlike the other three datasets, AirfRans (near) contains two global features: attack velocity and angle, which are directly concatenated to all queries. The original dataset consists of 800 training data and 200 testing data with

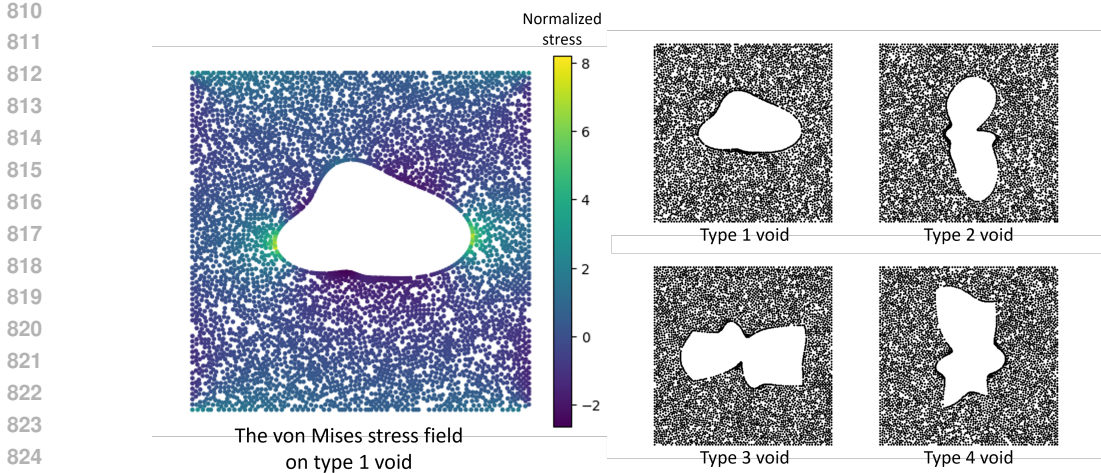

Figure 5: Examples of physics data and geometry data from the Stress dataset. Neural Operators only learn from von Mises stress fields on type 1 void, while observing the geometry data from geometries generated from 4 types of different void priors.

both geometry and physics information. We train transformer-based neural operators to predict the pressure fields around the airfoils in a truncated domain  $[-0.6, 1.6] \times [-0.5, 0.5]$  as shown in Figure 3. To learn the geometry representation, we follow the same airfoil geometry parameterization (with a different random seed) in AirfRans and generate 2000 geometry only datasets (occupancy fields) with 1600 for training the VAE, and 400 for testing.

**Inductor 3D.** We calculate the magnetic flux density field  $B$  around a 3D inductor by solving the Maxwell’s equations (Eq 8) in the frequency domain using Comsol.

$$\begin{aligned} \nabla \cdot B &= 0 \\ \nabla \times H &= J + j\omega\epsilon E \\ \nabla \times E &= -j\omega\mu H \end{aligned} \tag{8}$$

where  $H$  stands for magnetic field intensity,  $E$  is the electric field,  $J$  is the current density field,  $\epsilon$  is material permittivity (which is assumed to be 1 everywhere), and  $\mu$  is material permeability. Figure 6 shows an example of the 3D inductor, consisting of an EE type iron core whose mid pillar is surrounded by a copper coil within a computation domain of  $[-70, 70] \times [-70, 70] \times [-70, 70]$   $mm^3$  (normalized for VAE and neural operator training). Magnetic insulation  $n \times A$  is applied to the boundary of the computation domain, where  $n$  stands for the unit normal and  $A$  is the magnetic vector potential satisfying  $B = \nabla \times A$ . The copper coil contains 500 turns with a current density of  $1e6$   $A/m^2$ .

The iron core follows a nonlinear magnetizing curve as shown in Figure 7. The neural operators are trained to predict the steady state magnitude of the magnetic flux density field  $\|B\|$  at a high frequency of  $f = \frac{\omega}{2\pi} = 300$  kHz. The nonlinear material property curve and high excitation frequency make this 3D inductor dataset extremely challenging. We generate 3600 training data and 300 testing data by randomly selecting the geometry parameters of the iron core. We compute occupancy fields for all the data to train the VAE, while only 900 of the training data are simulated to train the neural operators as listed in Table 1.

**Electrostatics** An electrostatics dataset is built using Fenics where we solve for the electric potential  $\phi(x)$  from the following equation:

$$-\nabla \cdot (\epsilon(x)\nabla\phi(x)) = \rho(x) \tag{9}$$

where  $\epsilon(x)$  is the permittivity field, and  $\rho(x)$  is the charge density field. Both of these fields are scalar fields. Here we follow the Heaviside-Lorentz units, so permittivity is unitless. In our dataset, the whole solution domain  $\Omega$  is  $[0, 1] \times [0, 1]$  is divided into two parts separated by a random interface.



864  
865  
866  
867  
868  
869  
870  
871  
872  
873  
874  
875  
876  
877  
878  
879  
880  
881  
882  
883  
884  
885  
886  
887  
888  
889  
890  
891  
892  
893  
894  
895  
896  
897  
898  
899  
900  
901  
902  
903  
904  
905  
906  
907  
908  
909  
910  
911  
912  
913  
914  
915  
916  
917

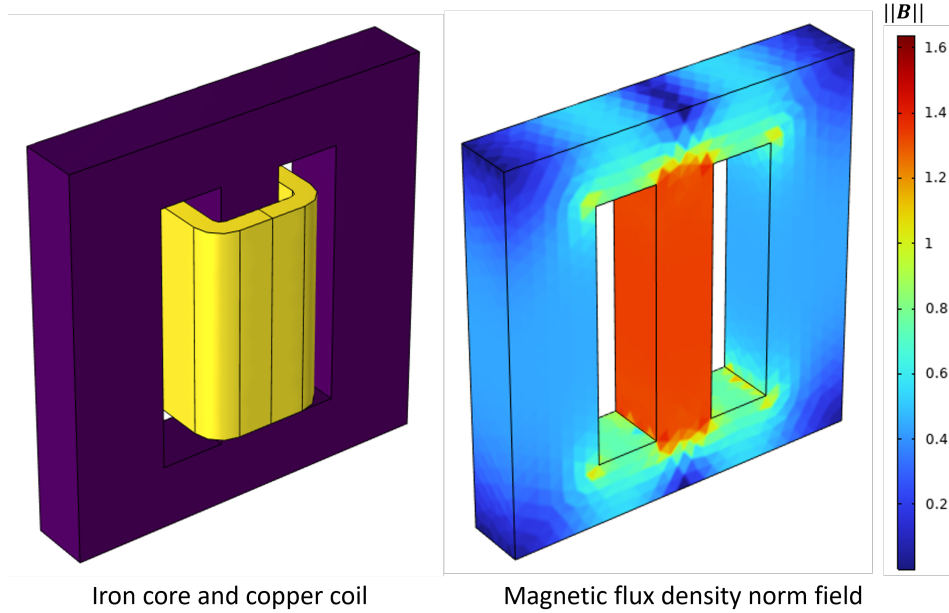

Figure 6: Example of a 3D inductor data. We generate the geometries (iron core in purple, coil in yellow) by parameterizing an EE type iron core, and calculate the corresponding magnetic flux density norm field (on the right).

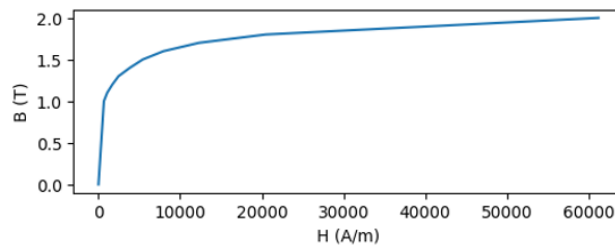

Figure 7: B-H curve of the iron core material.

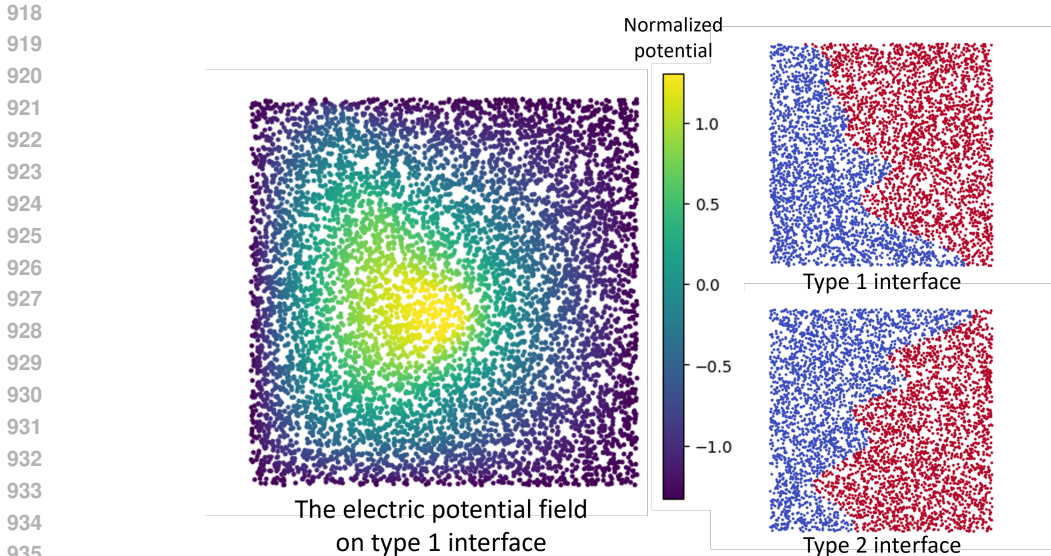

Figure 8: Examples of physics data and geometry data from the Electrostatics dataset. Neural Operators only learn from electric potential fields on type 1 interface, while observing geometry data generated from 2 types of different material interface priors.

The random interface between these two parts is determined with 10 random points. These 10 points are interpolated with third order spline interpolation to produce a curve as shown in the right part of Figure 8. The locations of the 10 random points are generated by adding a horizontal perturbation  $U(-0.2, 0.2)$  to 2 types of prior locations: 10 equally distanced points from  $(0.3, 1)$  to  $(0.7, 0)$  and from  $(0.7, 1)$  to  $(0.3, 0)$ . A charge density of 1 and permittivity of 15 is present in the blue part, while a charge density of 0 and permittivity of 1 is in the red part. The solution of this example case is shown in the left part of Figure 8. We generate 3800 training data and 200 testing data (occupancy fields) for each type of interface for geometry representation learning. Neural operators are trained with 1800 data and tested with 200 data (potential fields) from type 1 interface only.

## D ADDITIONAL EXPERIMENTS

In this section, we present a few additional ablation studies to examine the effectiveness of the proposed latent geometry representation under different data, training, model selection, and hyperparameter settings.

**Performance of UPT.** We also evaluate UPT on the Stress and Electrostatics dataset using our framework with the results shown in Table 8. We implement a simplified version using transformer for encoder, decoder, and propagator, while omitting the message passing layer and inverse encoding decoding training to avoid extensive tuning. The results indicate that our framework can be smoothly adapted to UPT and improve its prediction accuracy on scarce physics labels. We notice that GNOT and Transolver (query at input layer) show superior performance compared to LNO and UPT (query at output layer). A likely reason is that UPT and LNO are tailored for latent temporal rollouts, whereas all four benchmarks here are stationary physics. We also expect further improvement in UPT with the complete architecture and training recipe.

**Scarce physics dataset.** To assess the effectiveness of physics-agnostic pretraining, we conduct experiments on the AirfRans dataset in a data-scarce setting. In this setting, only 200 physics samples with PDE solutions  $u$  are used for training neural operators. The VAE in stage 1 is still trained on the complete geometry dataset with 2400 airfoil point clouds. The results in Table 14 show that prediction accuracy decreases compared to full-data setting in the main experiments, as expected. Meanwhile, we observe clear performance gains from the two-stage training strategy in most cases (except for LNO under random query). This supports our intuition that stage 1 training on proxy task

Table 8: Prediction error of UPT (simplified implementation) on the Stress and Electrostatics datasets. The two-stage training framework outperforms direct supervised operator learning.

| Model   | Relative L2 on normalized data ( $\times 10^{-2}$ ) |                |            |              |
|---------|-----------------------------------------------------|----------------|------------|--------------|
|         | Stress, Mesh                                        | Stress, Random | Elec, Mesh | Elec, Random |
| UPT     | 26.3                                                | 20.8           | 11.6       | 12.0         |
| UPT+VAE | 12.8                                                | 10.6           | 4.9        | 4.8          |

will be effective as long as the physics dataset (with PDE solution) is not dense. Under a rich PDE solution dataset setting, the performance gain from stage 1 may become minor.

Table 9: Comparison of prediction errors on the AirfRans dataset with scarce setting. Stage 1 encoders are still trained on all 2400 geometry data, while only 200 labeled physics data are used to train stage 2 neural operators.

| Dataset           | Relative L2 on normalized data ( $\times 10^{-2}$ ) |       |            |       |      |       |
|-------------------|-----------------------------------------------------|-------|------------|-------|------|-------|
|                   | GNOT                                                | G+VAE | Transolver | T+VAE | LNO  | L+VAE |
| AirfRans (Mesh)   | 15.8                                                | 13.9  | 22.2       | 21.3  | 61.0 | 52.9  |
| AirfRans (Random) | 12.8                                                | 10.2  | 32.9       | 21.0  | 52.1 | 52.8  |

**Effect of physics data size.** We investigate the effectiveness of the latent geometry representation under different sizes of physics datasets. We expand the physics training data to 3800 for the Stress dataset ( $\sigma_{vm}$  field on type 1 void) and the Electrostatics dataset ( $\phi$  field on type 1 interface), while using the same VAE as in the main experiments (VAE3 in Table 3). Table 10 shows the performance of GNOT trained with different amount of physics data. For both datasets, we observe significant reduction in relative error for GNOT and GNOT+VAE when physics datasets are expanded. The performance improvement from replacing geometry representation is consistent across different sizes of physics data. Interestingly, the VAE used for the Stress dataset only observes 1900 random geometries generated from type 1 void prior, but still enhances the performance of GNOT when trained with 3800 physics data.

Table 10: Prediction error of GNOT (with and without stage 1), trained with different number of physics data. We use the same VAE as in the main experiments.

| Dataset        | Num of physics data | Relative L2 on normalized data ( $\times 10^{-2}$ ) |        |          |        |
|----------------|---------------------|-----------------------------------------------------|--------|----------|--------|
|                |                     | GNOT                                                |        | GNOT+VAE |        |
| Query method   |                     | Mesh                                                | Random | Mesh     | Random |
| Stress         | 950                 | 18.4                                                | 17.6   | 15.4     | 12.9   |
|                | 1900                | 9.8                                                 | 10.3   | 9.0      | 8.3    |
|                | 3800                | 7.5                                                 | 7.2    | 7.1      | 5.7    |
| Electrostatics | 900                 | 6.4                                                 | 6.7    | 5.1      | 5.3    |
|                | 1800                | 4.2                                                 | 4.6    | 3.3      | 3.4    |
|                | 3800                | 3.1                                                 | 3.3    | 2.3      | 2.3    |

**Masked Autoencoder** . We evaluate masked autoencoder (MAE) as an alternative physics-agnostic pretraining method. The experimental results on the electrostatics dataset are shown in Table 11, where MAE(x) stands for masked autoencoder with mask ratio of x. We notice that MAE pretraining also achieve slightly improved accuracy compared to direct supervised learning. However, the improvement is rather marginal compared to our pretraining framework with occupancy proxy task. The physics-agnostic pretraining process via MAE attempts to predict the permittivity on some randomly masked points on the electrostatics dataset. This objective doesn't provide much information to the encoder, as there exists no prior constraints on the permittivity field  $a$ , unlike the solution field  $u$ . Also, MAE was designed for pixel space problems rather than point clouds. Therefore, we think MAE fits better for pixel space tasks or physics-aware pretraining such as learning representations of  $u$  for downstream autoregressive task (predict  $u_{t+1}$  from  $u_t$ ).

Table 11: Comparison of prediction errors on the electrostatics dataset among single stage training on GNOT, our occupancy pretraining, and masked autoencoder pretraining.

| Dataset                 | Relative L2 on normalized data ( $\times 10^{-2}$ ) |       |            |            |
|-------------------------|-----------------------------------------------------|-------|------------|------------|
|                         | GNOT                                                | G+VAE | G+MAE(0.3) | G+MAE(0.7) |
| Electrostatics (Mesh)   | 4.2                                                 | 3.3   | 4.1        | 4.2        |
| Electrostatics (Random) | 4.6                                                 | 3.4   | 4.3        | 4.3        |

**Effect of batch size.** For efficient training, a large batch size of 100 is employed in the main experiments (including error estimation) and ablation studies. Additionally, we assess the proposed framework’s performance under a conventional batch size of 32. Table 12 presents the results of neural operators trained with identical settings as the main experiments 4, except for the smaller batch size. A reduction in relative error can be observed for all experiments when trained at a smaller batch size. Meanwhile, the latent geometry representation improves the performance of neural operator in most experiments. However, its impact is minimal in four of the comparisons: GNOT on Stress with mesh query, GNOT on Inductor (3D) with both queries, and Transolver on Inductor (3D) with mesh query. We also observe performance drop when training Transolver on the Stress dataset. A potential explanation is that simply replacing Transolver’s first layer with a linear cross-attention layer may be insufficient to fully leverage the latent geometry representation.

Table 12: Comparison of neural operator performance with batch size of 32. All other model/training hyperparameters remain the same as in the main experiments. Experiments demonstrating significant performance enhancement are highlighted in bolded fonts.

| Dataset              | Query  | Relative L2 on normalized data ( $\times 10^{-2}$ ) |            |           |             |           |             |
|----------------------|--------|-----------------------------------------------------|------------|-----------|-------------|-----------|-------------|
|                      |        | GNOT                                                | G+VAE      | Trans     | T+VAE       | LNO       | L+VAE       |
| Number of parameters |        | 1.7-1.8 M                                           |            | 1.7-1.8 M |             | 1.8-1.9 M |             |
| Stress               | Mesh   | 6.8                                                 | 6.7        | 6.9       | 7.6         | 13.1      | <b>9.3</b>  |
|                      | Random | 6.1                                                 | <b>5.5</b> | 6.2       | 6.7         | 14.4      | <b>6.5</b>  |
| AirfRans             | Mesh   | 4.1                                                 | <b>3.6</b> | 7.9       | <b>6.3</b>  | 20.6      | <b>18.2</b> |
|                      | Random | 5.6                                                 | <b>3.6</b> | 8.9       | <b>6.4</b>  | 16.9      | <b>5.8</b>  |
| Inductor (3D)        | Mesh   | 4.8                                                 | 4.9        | 5.6       | 5.6         | 10.7      | <b>7.5</b>  |
|                      | Random | 10.7                                                | 10.6       | 12.2      | <b>11.7</b> | 15.3      | <b>11.9</b> |
| Electrostatics       | Mesh   | 3.0                                                 | <b>2.1</b> | 3.2       | <b>1.8</b>  | 7.8       | <b>2.8</b>  |
|                      | Random | 3.3                                                 | <b>2.3</b> | 3.8       | <b>1.8</b>  | 6.9       | <b>2.8</b>  |

**Hidden dimension of neural operators.** Table 13 shows the results of neural operators with a hidden dimension of 256 and head number of 8, which drastically increases the number of learnable parameters. Larger neural operators achieve lower relative error compared to the main experiments in Table 2, with the learned geometry representation still outperforming point clouds in most cases. Minimal impact from the latent geometry representation is observed in two comparisons: GNOT on Stress with mesh query, and GNOT on Inductor (3D) with random query. Performance drop is observed in three cases: GNOT on Inductor (3D) with mesh query, Transolver on Stress with mesh query, and Transolver on Inductor (3D) with mesh query. Notably, this is the only scenario where applying the latent geometry representation leads to performance degradation in GNOT. A potential explanation is that the iron core only takes a relatively small occupancy volume in 3D, making it difficult for the VAE (trained with a BCE reconstruction loss) to capture the geometry accurately. The performance drop in Transolver has been discussed in **Effect of batch size**.

**Size of latent tokens.** We ablate the stage 1 VAE latent configuration by comparing their effect on Stress dataset using GNOT in stage 2 as shown in Table 14, where N\*M in column headers indicates N tokens of dimension M. Results show that 256 latent tokens with 32 dimensions give the best performance across both mesh-based and random query strategies. Increasing token number or dimension doesn’t yield consistent gains. Instead, the latent size appears to strike a balance between expressiveness and regularization.

Table 13: Comparison of neural operator performance with hidden dimension of 256. All other model/training hyperparameters remain the same as in the main experiments. Experiments demonstrating significant performance enhancement are highlighted in bolded fonts.

| Dataset              | Query  | Relative L2 on normalized data ( $\times 10^{-2}$ ) |            |       |             |       |             |
|----------------------|--------|-----------------------------------------------------|------------|-------|-------------|-------|-------------|
|                      |        | GNOT                                                | G+VAE      | Trans | T+VAE       | LNO   | L+VAE       |
| Number of parameters |        | 6.9 M                                               |            | 6.9 M |             | 7.6 M |             |
| Stress               | Mesh   | 7.6                                                 | 7.7        | 7.7   | 8.6         | 22.4  | <b>10.2</b> |
|                      | Random | 7.3                                                 | <b>6.3</b> | 8.6   | <b>7.5</b>  | 18.0  | <b>8.7</b>  |
| AirfRans             | Mesh   | 6.0                                                 | <b>4.1</b> | 9.2   | <b>8.5</b>  | 25.3  | <b>13.9</b> |
|                      | Random | 6.1                                                 | <b>4.2</b> | 12.0  | <b>8.1</b>  | 19.4  | <b>9.4</b>  |
| Inductor (3D)        | Mesh   | 5.4                                                 | 6.1        | 6.7   | 7.2         | 21.5  | <b>8.2</b>  |
|                      | Random | 11.4                                                | 11.3       | 13.4  | <b>12.0</b> | 15.9  | <b>12.1</b> |
| Electrostatics       | Mesh   | 3.4                                                 | <b>2.5</b> | 4.3   | <b>2.2</b>  | 10.2  | <b>3.1</b>  |
|                      | Random | 3.8                                                 | <b>2.6</b> | 4.6   | <b>2.2</b>  | 9.8   | <b>3.1</b>  |

Table 14: Comparison of stage 2 accuracy of GNOT on the Stress dataset using different sizes of stage 1 latent. Columns denote the latent configuration (# token \* latent dimension).

| Dataset        | Relative L2 on normalized data ( $\times 10^{-2}$ ) |        |            |            |        |            |        |
|----------------|-----------------------------------------------------|--------|------------|------------|--------|------------|--------|
|                | No VAE                                              | 128*32 | 128*64     | 256*32     | 256*64 | 512*32     | 512*64 |
| Stress, Mesh   | 9.8                                                 | 10.0   | 9.6        | <b>9.0</b> | 9.5    | <b>9.0</b> | 9.2    |
| Stress, Random | 10.3                                                | 8.4    | <b>8.3</b> | <b>8.3</b> | 8.6    | 8.8        | 8.6    |

## E COMPUTE RESOURCES

We list the number of parameters and memory cost for training the VAEs and transformer-based neural operators in this section. Training time per epoch is not included as experiments are carried out on different GPUs (A100 or V100). To conduct experiments efficiently, we use a large batch size of 100 for all experiments. However, we also conduct extra experiments to examine the effectiveness of the proposed framework under a normal batch size of 32, as discussed in Appendix D. Other hyperparameters are listed in section 4.

Table 15: Number of parameters and memory consumption for stage 1 VAE training and stage 2 neural operator (hidden dimension of 128) training. The difference among different experiments is negligible.

| Metric         | VAE Encoder | VAE Decoder | GNOT | Transolver | LNO  |
|----------------|-------------|-------------|------|------------|------|
| Parameters (M) | 1.1         | 8.2         | 1.74 | 1.71       | 1.92 |
| Memory (GB)    |             | 11.9        | 29.9 | 32.1       | 7.5  |

## F BROADER IMPACTS

This work introduces a two-stage physics-agnostic pretraining framework to enhance the performance of neural operators. We expect positive impact in research and industry fields where partial differential equations are solved to simulate the physical world. However, we don't envision any misusing of our methods or causing any negative social impact.
